# Supplementary material for: Efficient Catalytic Oxidation of 3-Arylthio- and 3-Cyclohexylthio-lapachone Derivatives to New Sulfonyl Derivatives and Evaluation of Their Antibacterial Activities
Source: Molecules. 2017 Feb 16;22(2):302. doi: 10.3390/molecules22020302 (PMC6155948; doi:10.3390/molecules22020302)
Supplement: Supplementary file 1 [file molecules-22-00302-s001.pdf]

## **Efficient Catalytic Oxidation of 3-Arylthio- and 3-Cyclohexylthio-lapachone Derivatives to New Sulfonyl Derivatives and Evaluation of Their Antibacterial Activities**

Mariana F. do C. Cardoso, Ana T. P. C. Gomes, Caroline dos S. Moreira, Mário M. Q. Simões, Maria G. P. M. S. Neves, David R. da Rocha, Fernando de C. da Silva, Catarina Moreirinha, Adelaide Almeida, Vitor F. Ferreira and José A. S. Cavaleiro

|                                                                              |                     |
|------------------------------------------------------------------------------|---------------------|
| <b>Figure 01:</b> NMR and mass spectral data of the compound <b>7a</b> ----- | Pages 2 and 3       |
| <b>Figure 02:</b> NMR and mass spectral data of the compound <b>7b</b> ----- | Pages 4 and 5       |
| <b>Figure 03:</b> NMR and mass spectral data of the compound <b>7c</b> ----- | Pages 6 and 7       |
| <b>Figure 04:</b> NMR and mass spectral data of the compound <b>7d</b> ----- | Pages 8 and 9       |
| <b>Figure 05:</b> NMR and mass spectral data of the compound <b>7e</b> ----- | Pages 10 and 11     |
| <b>Figure 06:</b> NMR and mass spectral data of the compound <b>7f</b> ----- | Pages 12 and 13     |
| <b>Figure 07:</b> NMR and mass spectral data of the compound <b>7g</b> ----- | Pages 14 and 15     |
| <b>Figure 08:</b> NMR and mass spectral data of the compound <b>4g</b> ----- | Pages 16, 17 and 18 |

*3-(4-fluorophenyl)sulfonyl-2,2-dimethyl-2,3-dihydronaphtho[1,2-b]furan-4,5-dione (7a)*

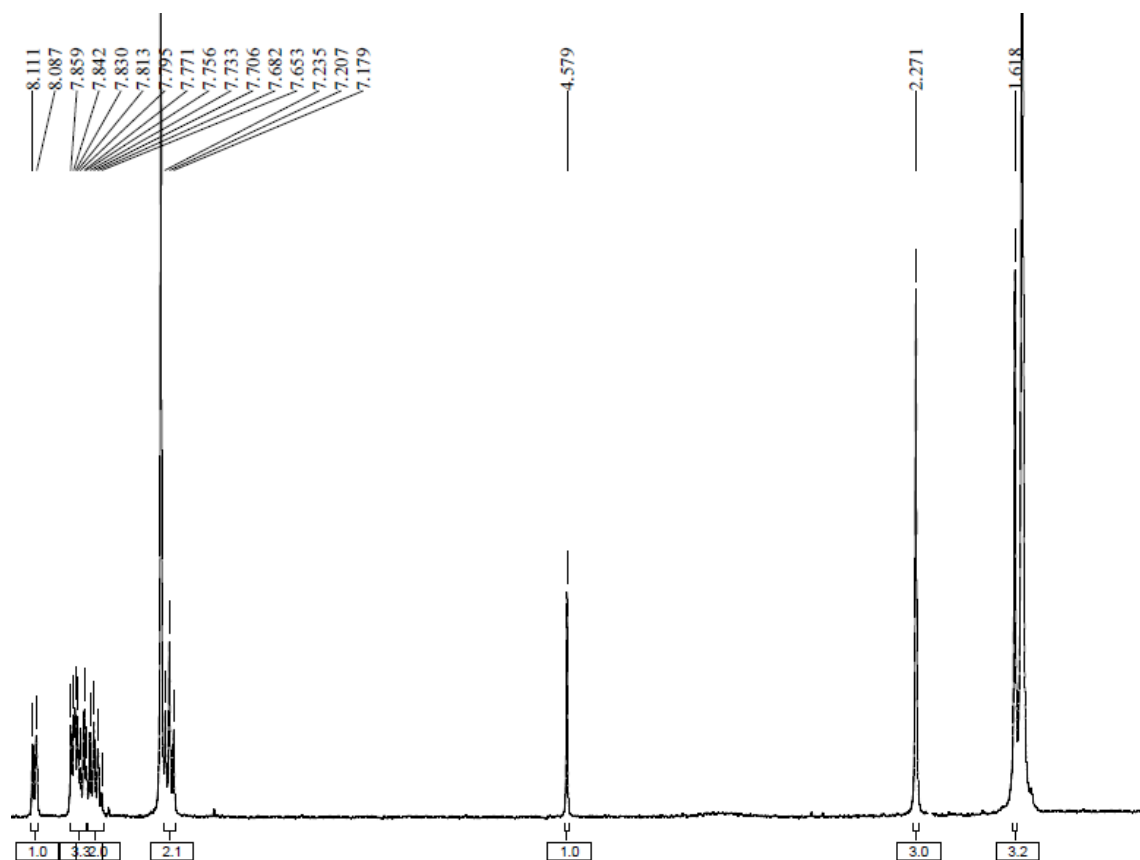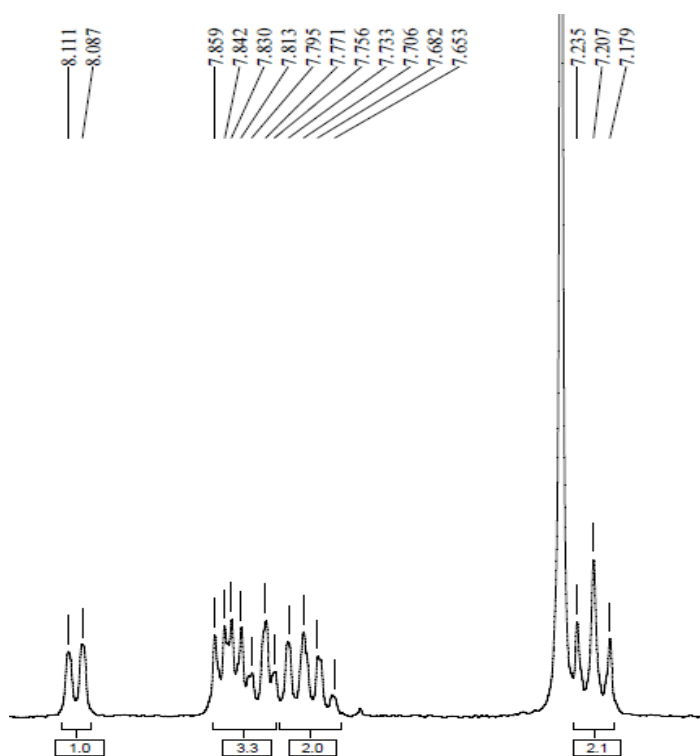

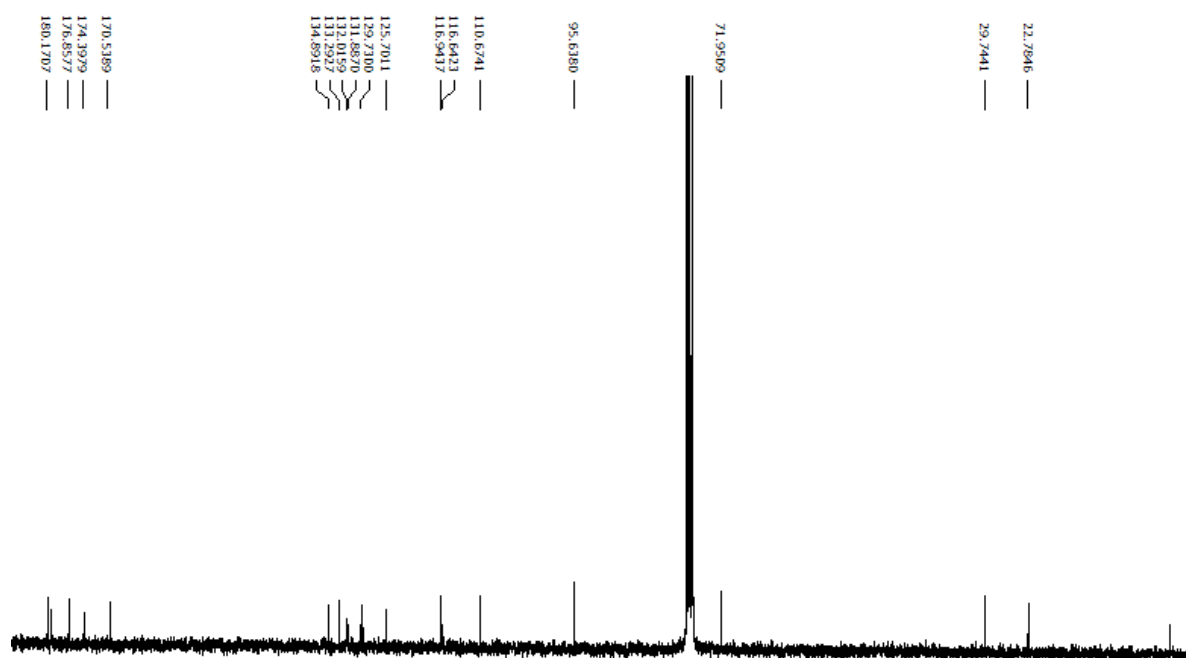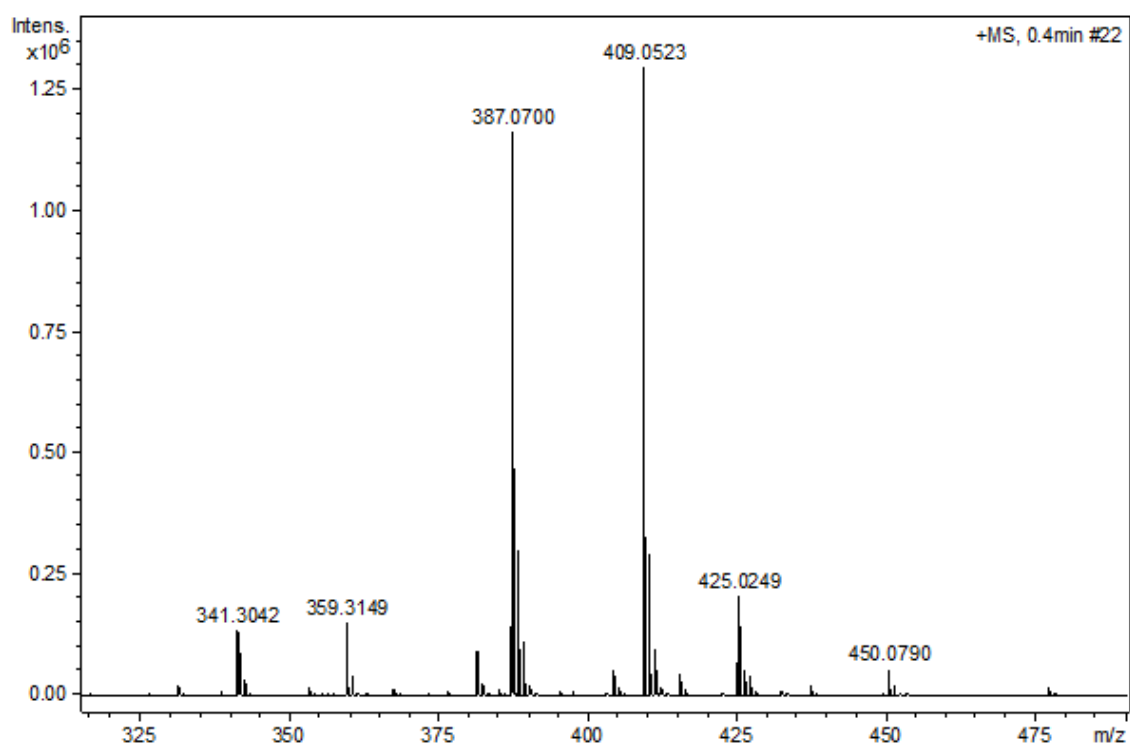

**Figure 01:** NMR and mass spectral data of the compound **7a**.

*3-(4-chlorophenyl)sulfonyl-2,2-dimethyl-2,3-dihydronaphtho[1,2-b]furan-4,5-dione*

**(7b)**

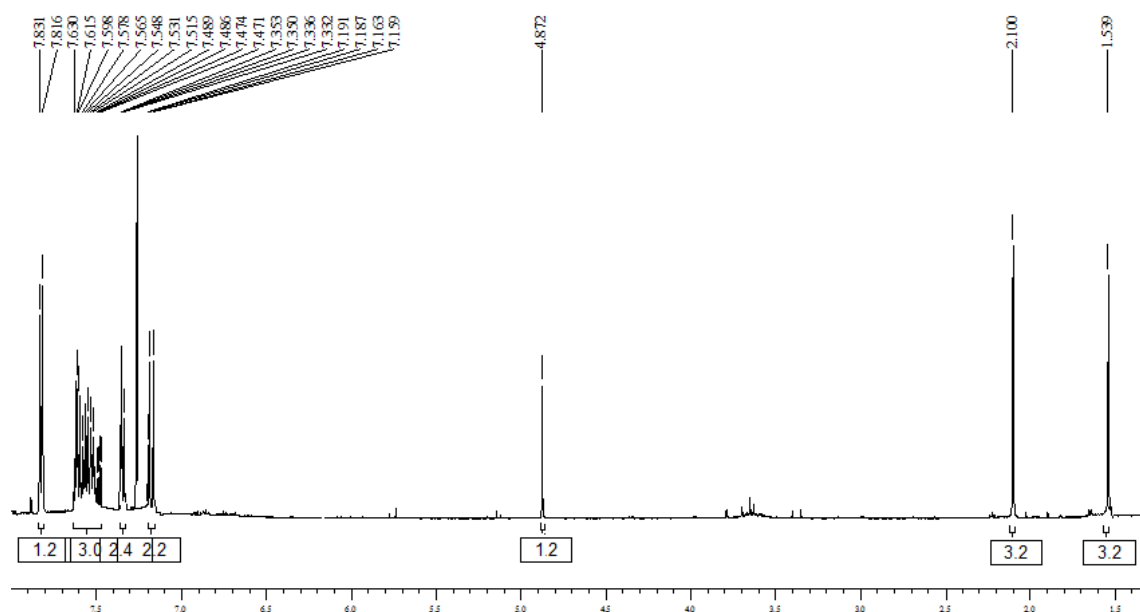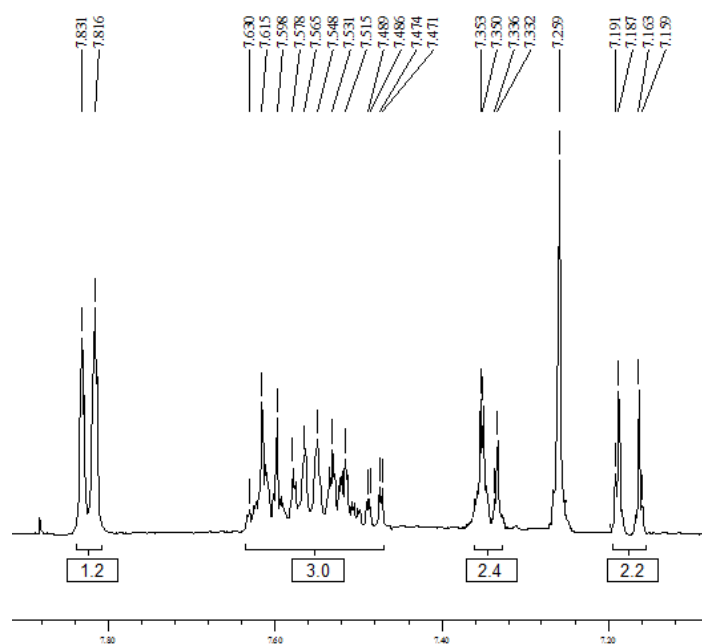

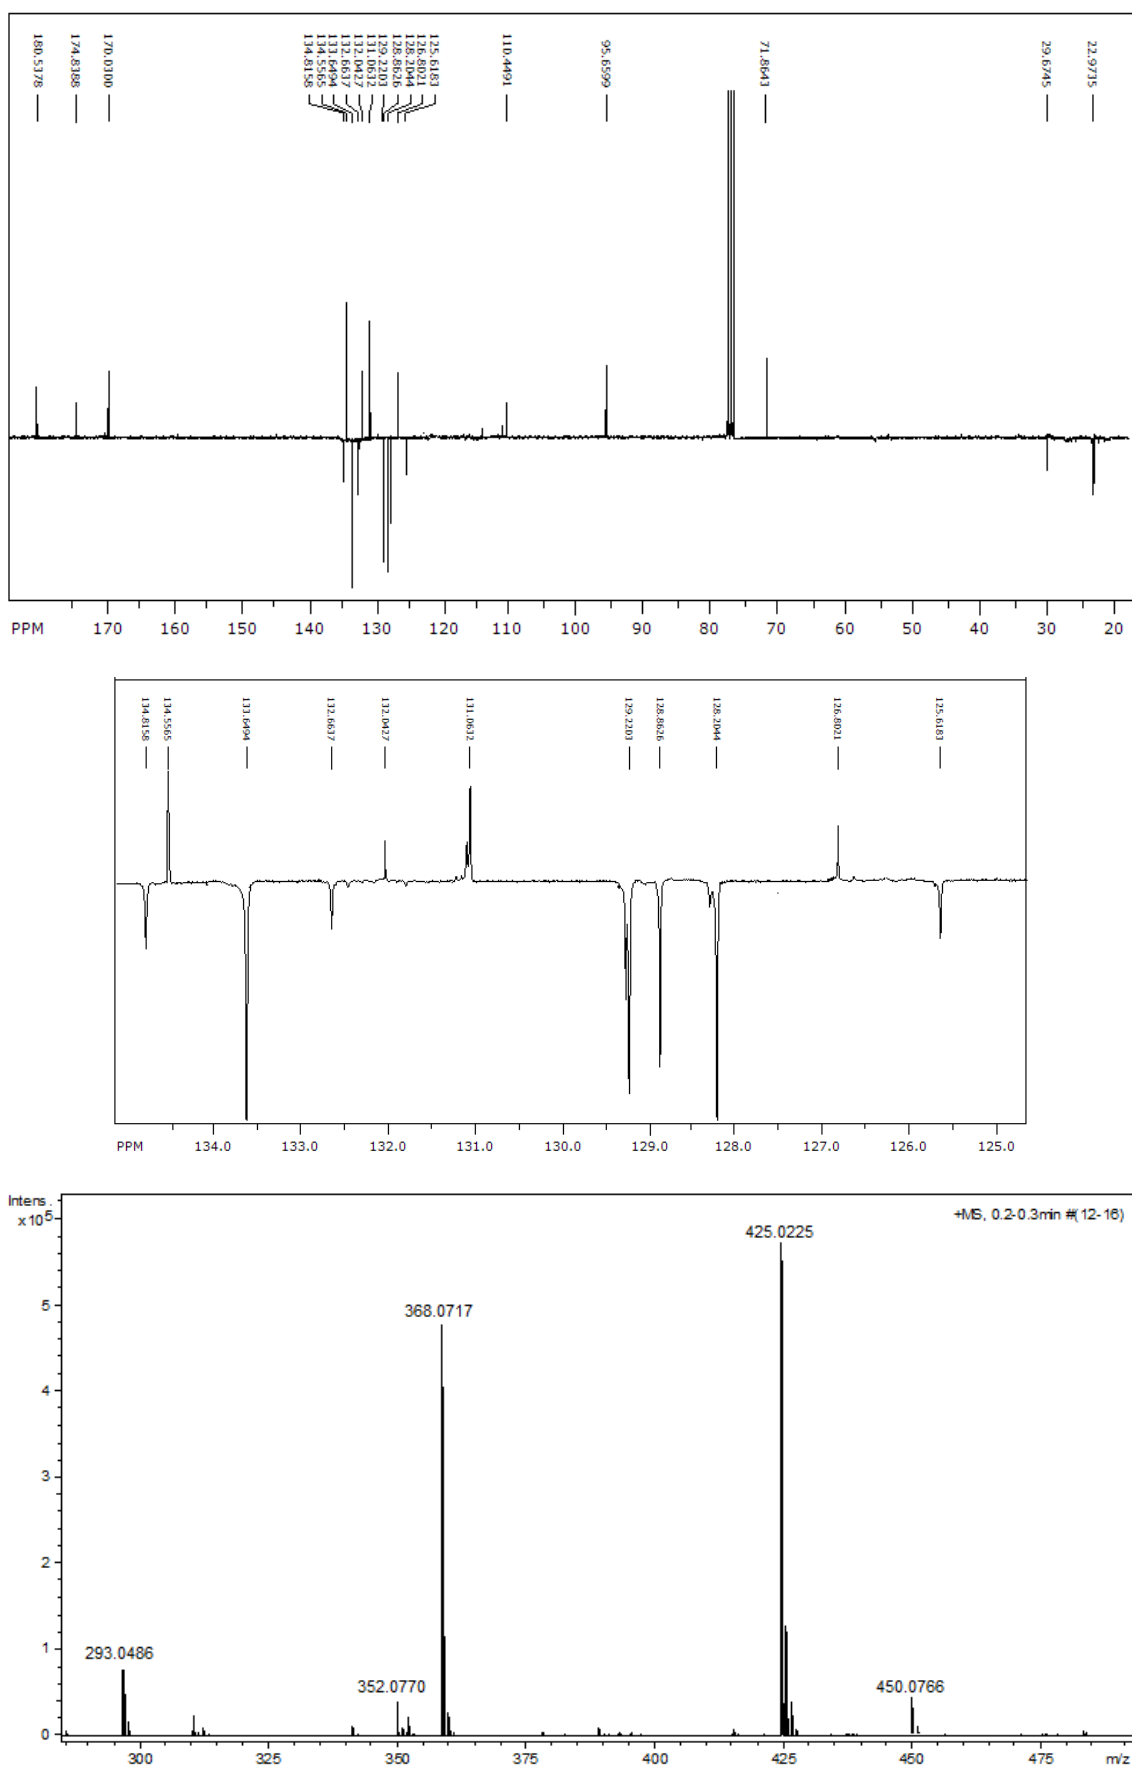

**Figure 02:** NMR and mass spectral data of the compound **7b**

<sup>1</sup>H NMR spectrum of compound **1** in CDCl<sub>3</sub>. The spectrum shows peaks in the aromatic region (6.7–8.1 ppm), a methine peak at 4.522 ppm, and aliphatic peaks at 1.635, 1.841, and 2.039 ppm. Integration values are provided below the peaks: 0.9, 3.2, 2.1, 1.0, 3.4, 3.4, and 1.5. A list of chemical shifts is shown at the top.

| Chemical Shift (ppm) | Integration |
|----------------------|-------------|
| 8.069                | 0.9         |
| 8.055                | 0.9         |
| 7.630                | 3.2         |
| 7.636                | 3.2         |
| 7.619                | 3.2         |
| 7.613                | 3.2         |
| 7.602                | 3.2         |
| 7.591                | 3.2         |
| 7.576                | 3.2         |
| 7.572                | 3.2         |
| 7.561                | 3.2         |
| 7.557                | 3.2         |
| 7.508                | 2.1         |
| 7.490                | 2.1         |
| 7.289                | 2.1         |
| 6.785                | 2.1         |
| 6.768                | 2.1         |
| 4.522                | 1.0         |
| 2.039                | 3.4         |
| 1.841                | 3.4         |
| 1.635                | 1.5         |

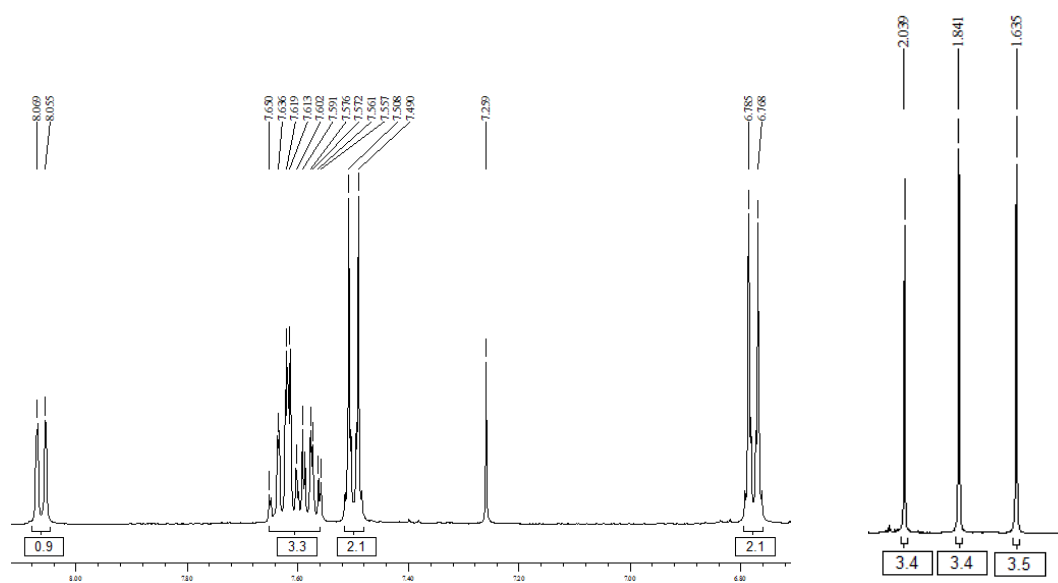

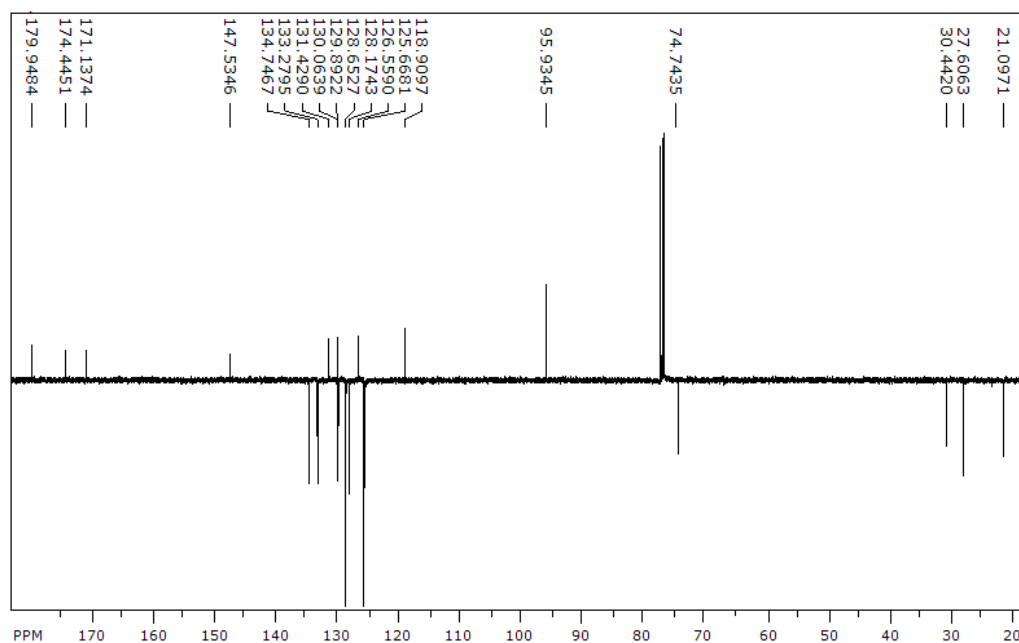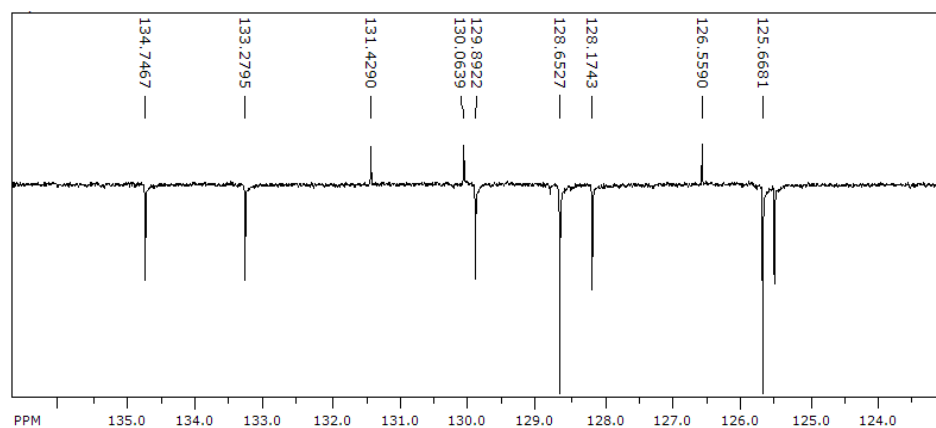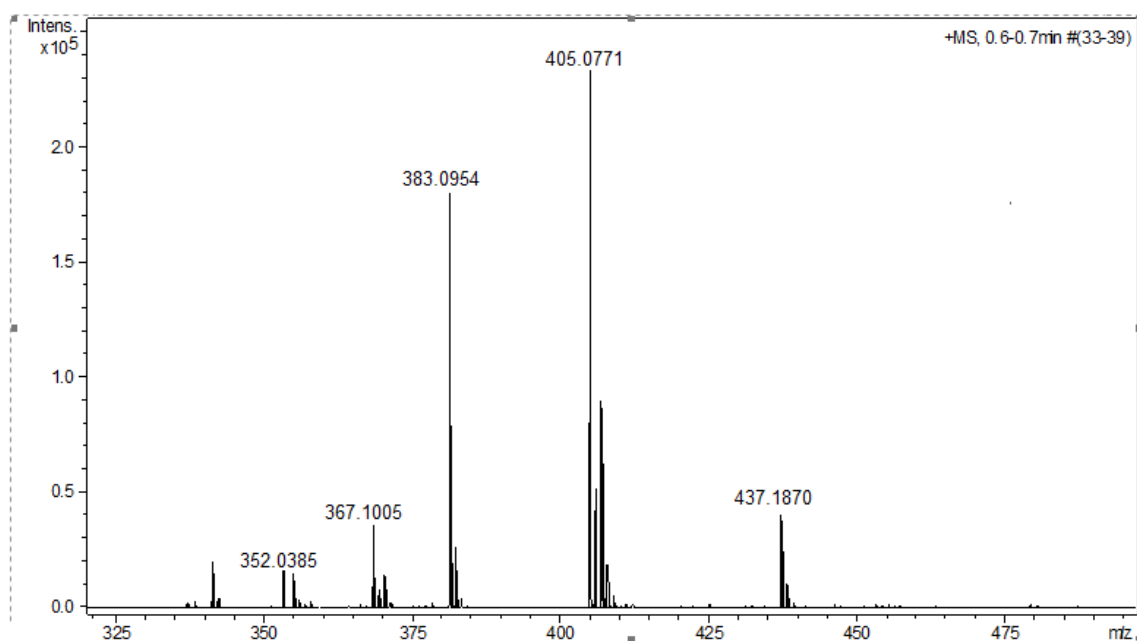

**Figure 03:** NMR and mass spectral data of the compound **7c**

*2,2-dimethyl-3-phenylsulfonyl-2,3-dihydronaphtho[1,2-b]furan-4,5-dione (7d)*

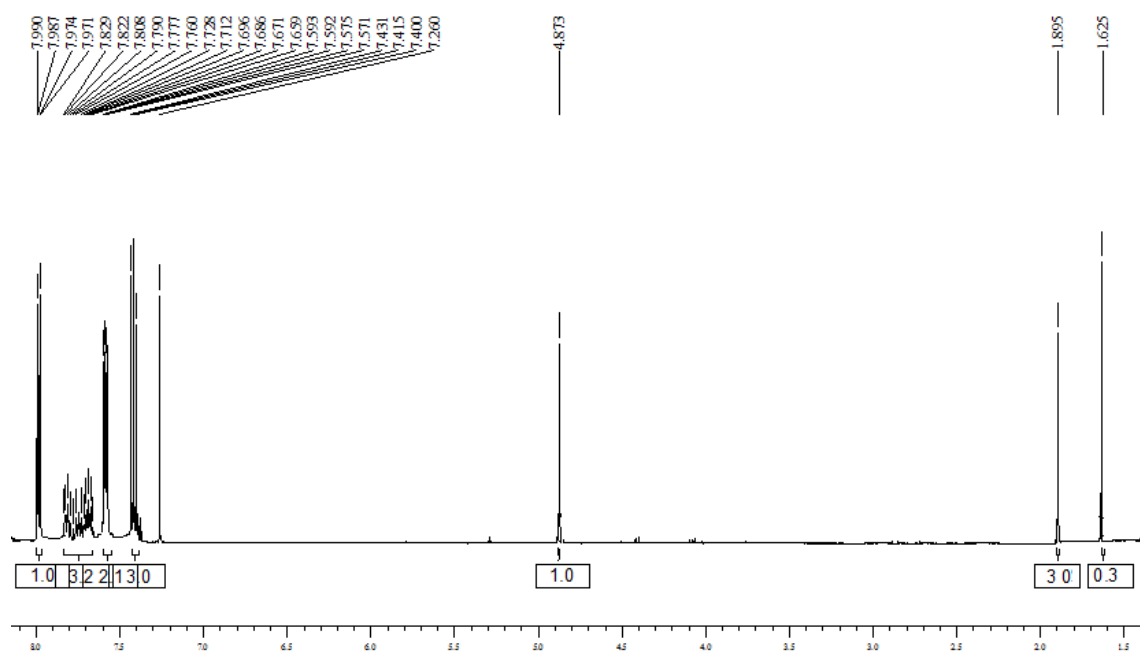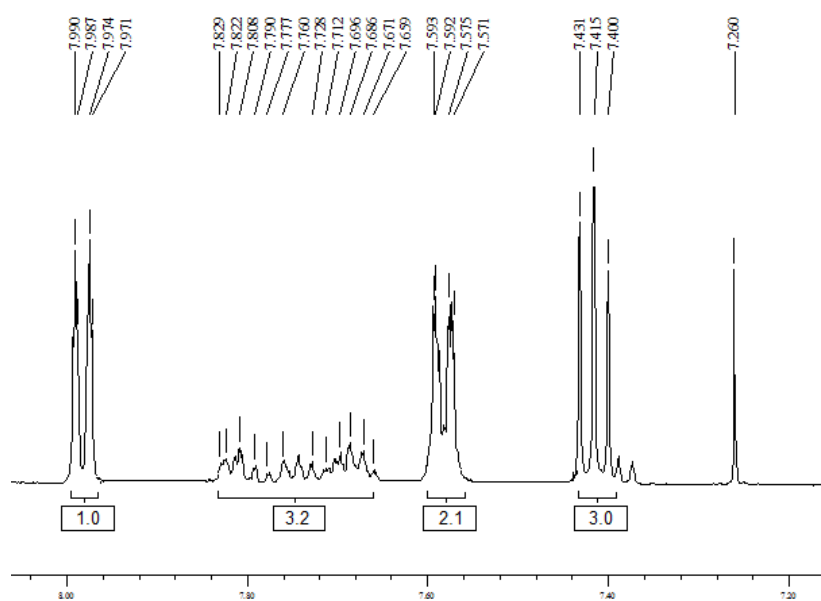

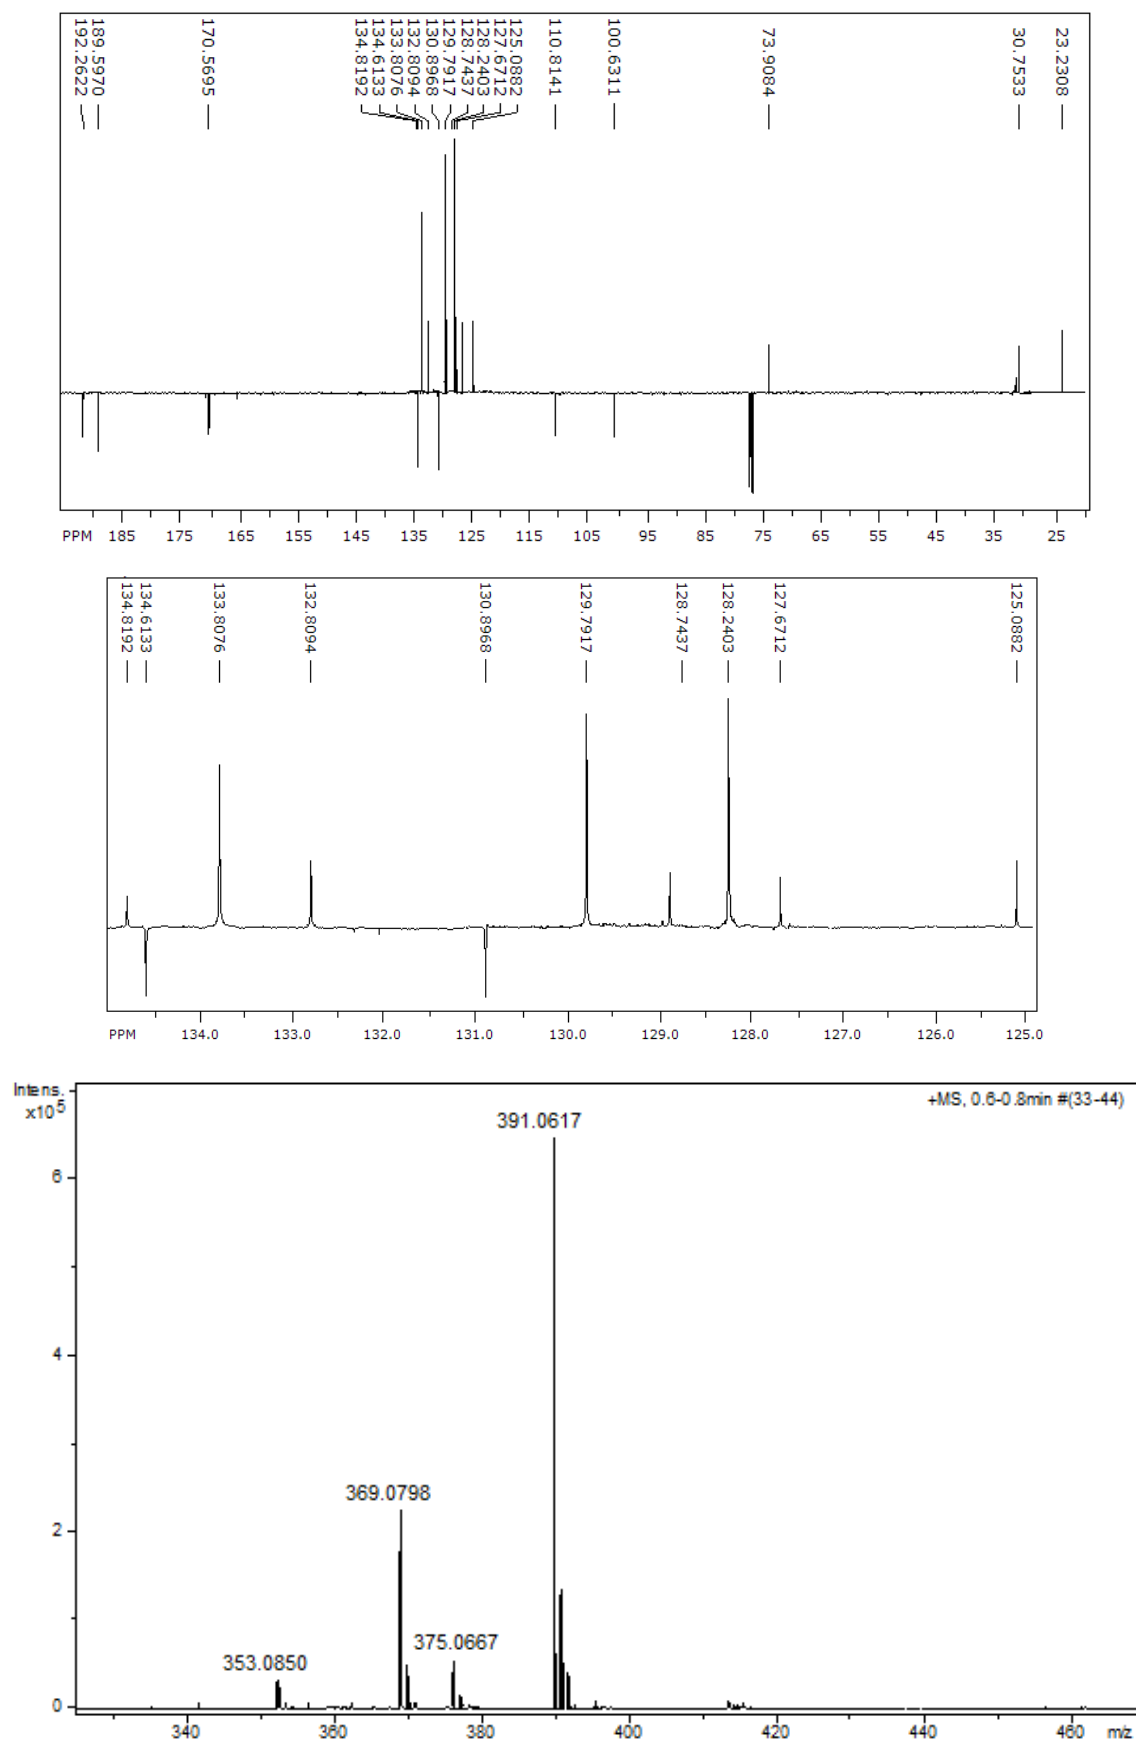

**Figure 04:** NMR and mass spectral data of the compound **7d**

2,2-dimethyl-3-*m*-tolylsulfonyl-2,3-dihydronaphtho[1,2-*b*]furan-4,5-dione (**7e**)

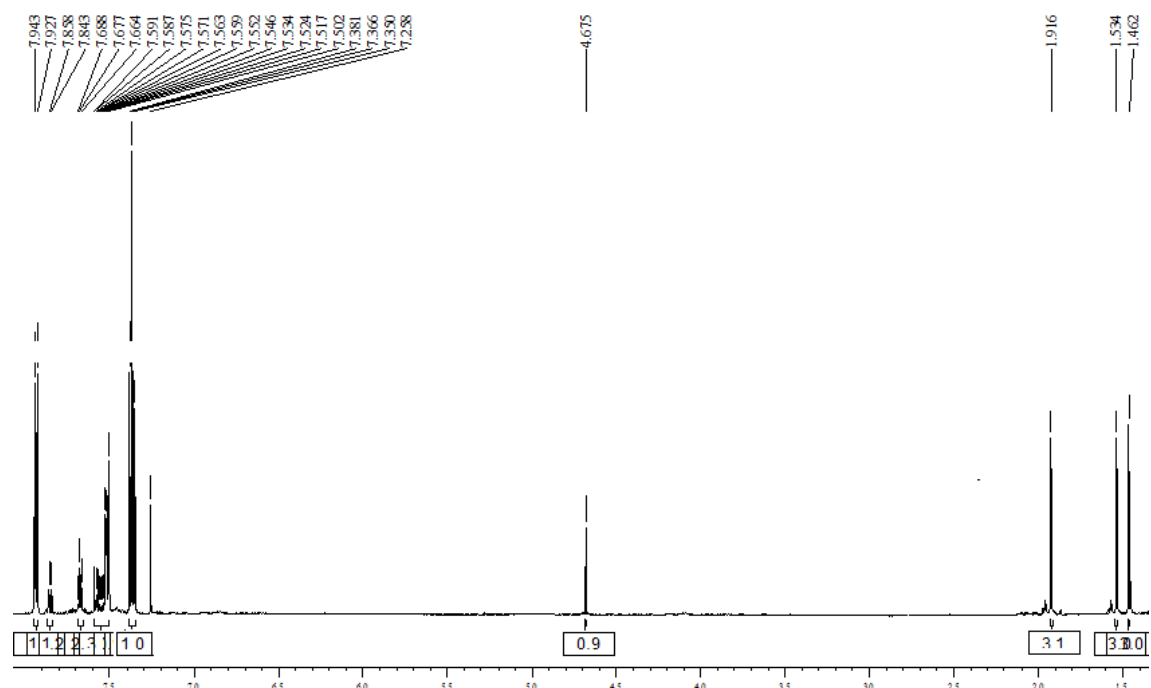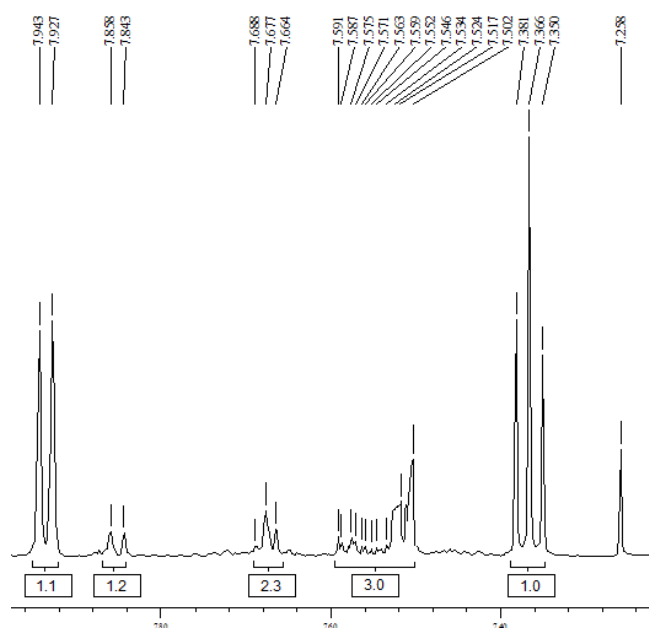

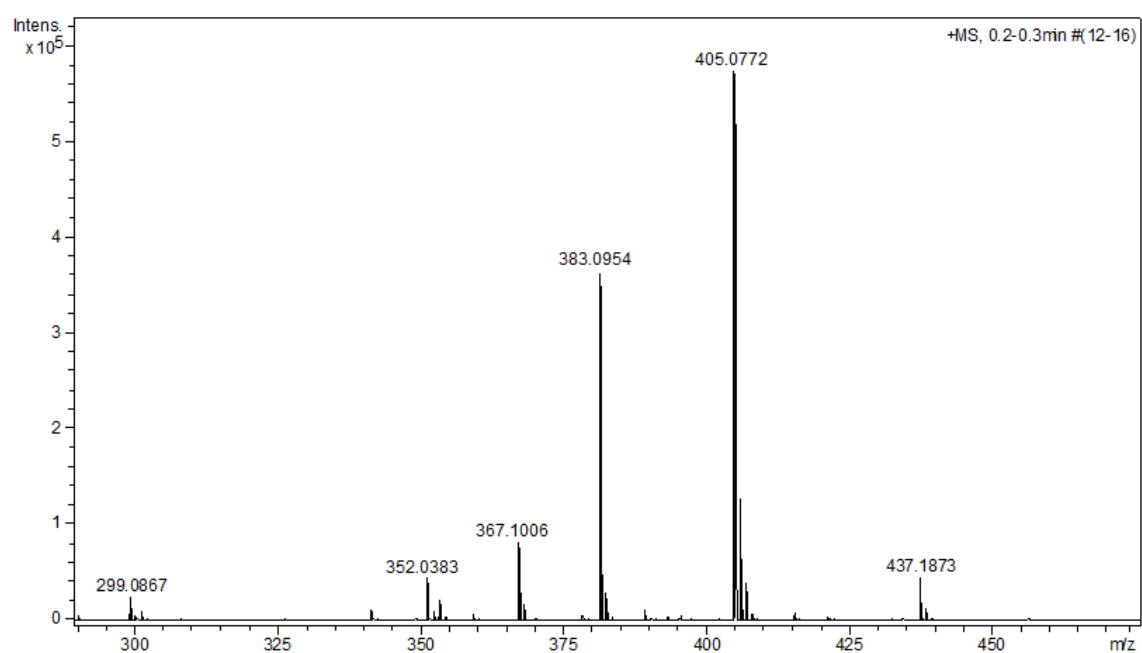

**Figure 05:** NMR and mass spectral data of the compound **7e**

*3-pentafluorophenylsulfonyl-2,2-dimethyl-2,3-dihydronaphtho[1,2-*b*]furan-4,5-dione*  
(7f)

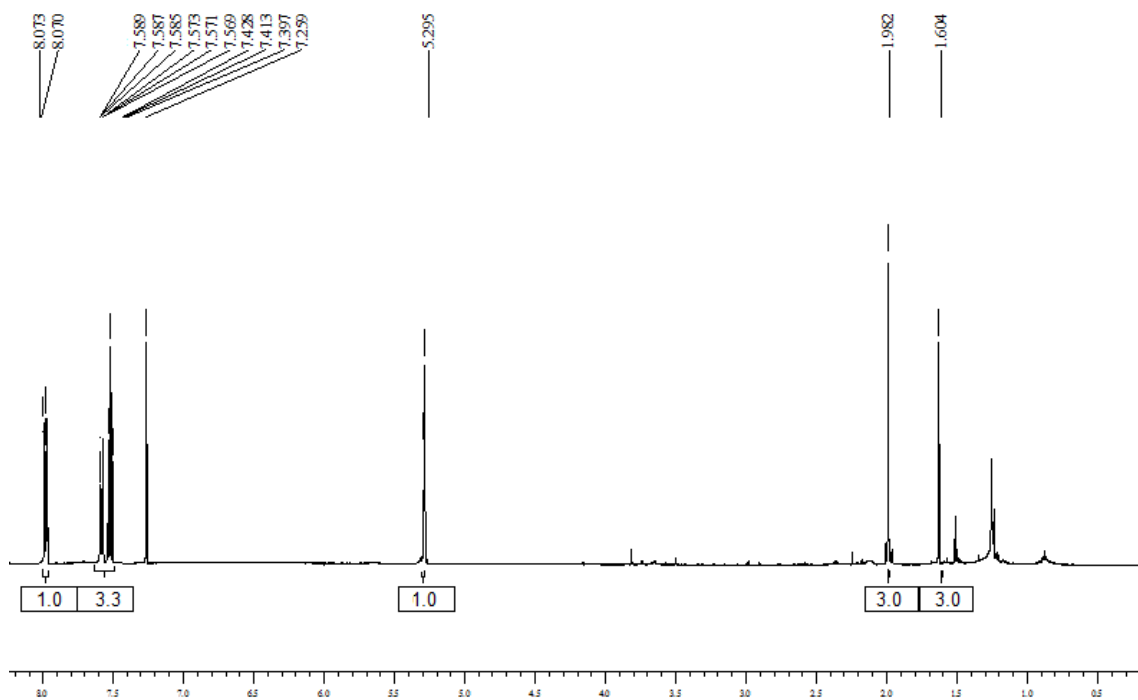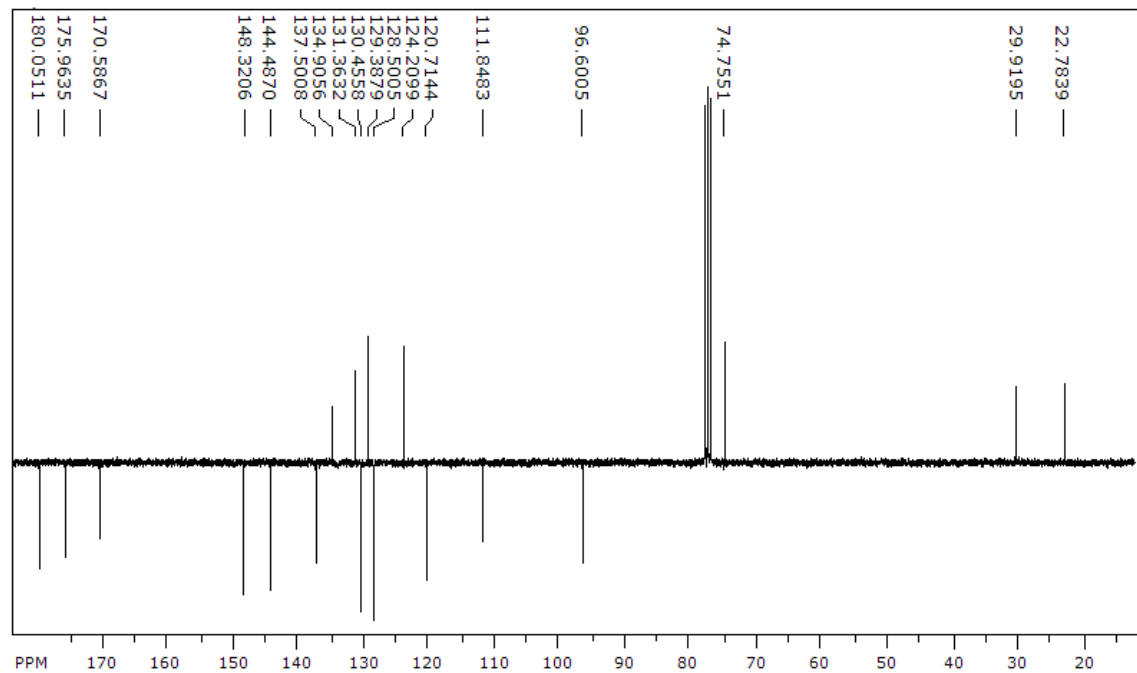

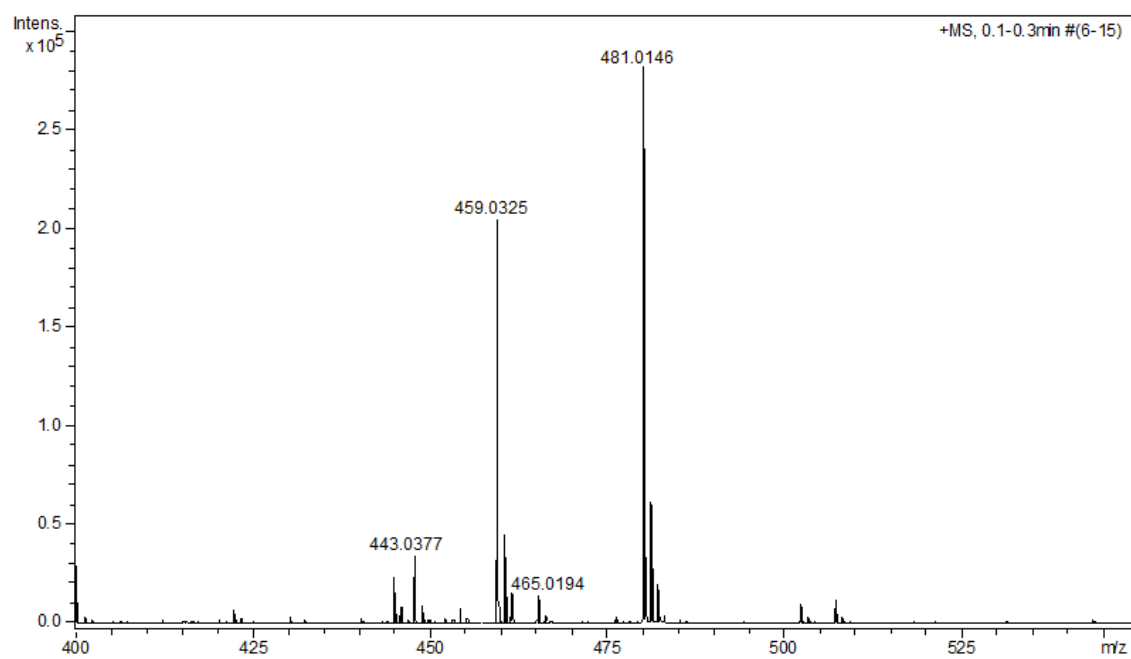

**Figure 06:** NMR and mass spectral data of the compound **7f**

*3-cyclohexylsulfonyl-2,2-dimethyl-2,3-dihydronaphtho[1,2-b]furan-4,5-dione (7g)*

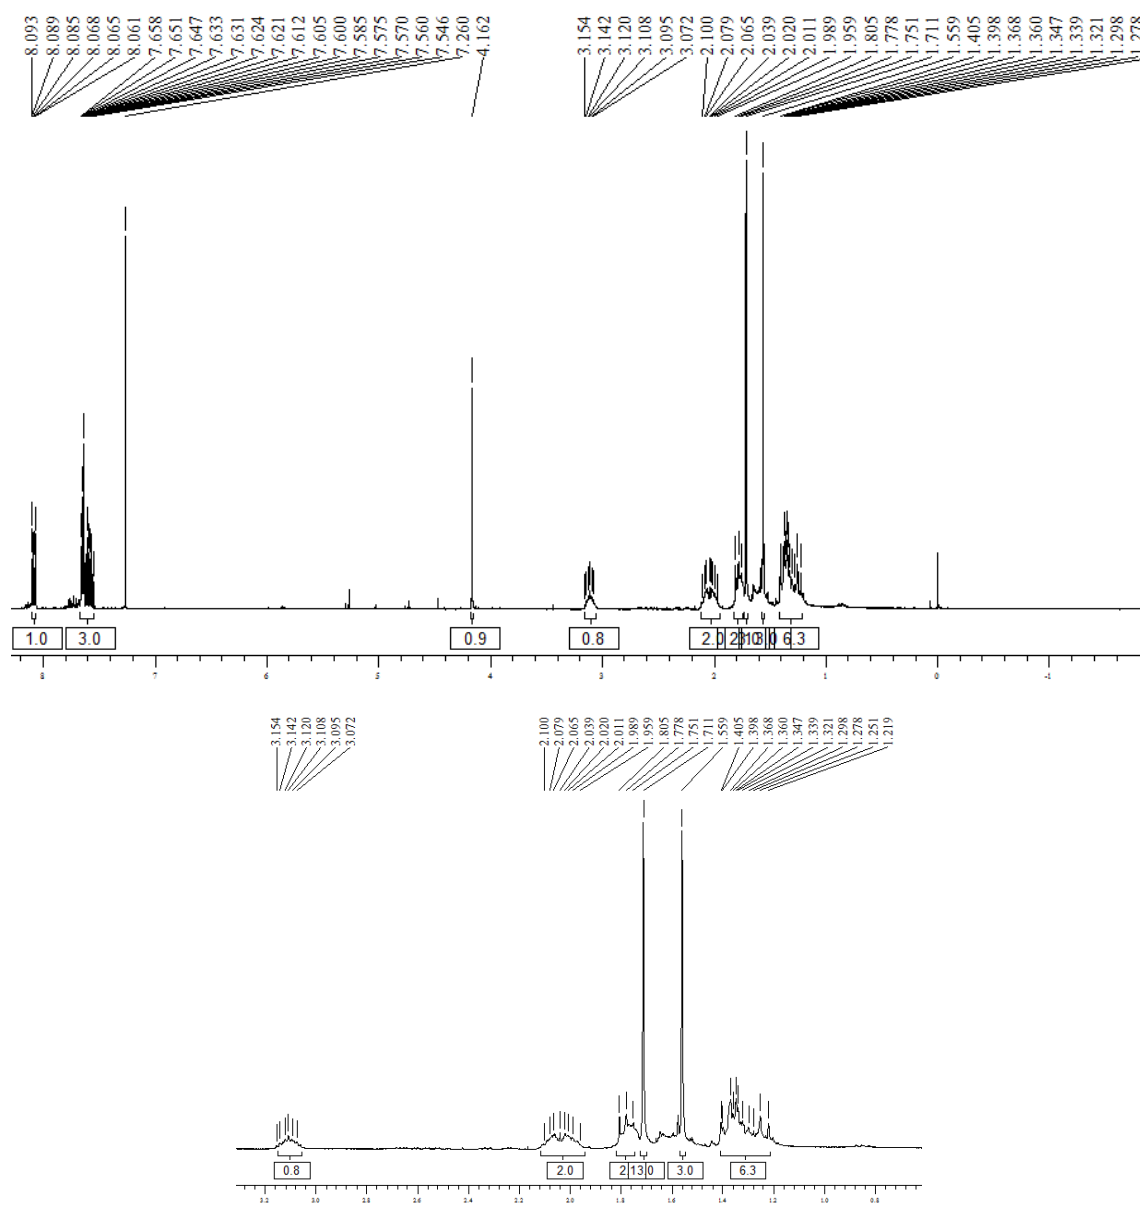

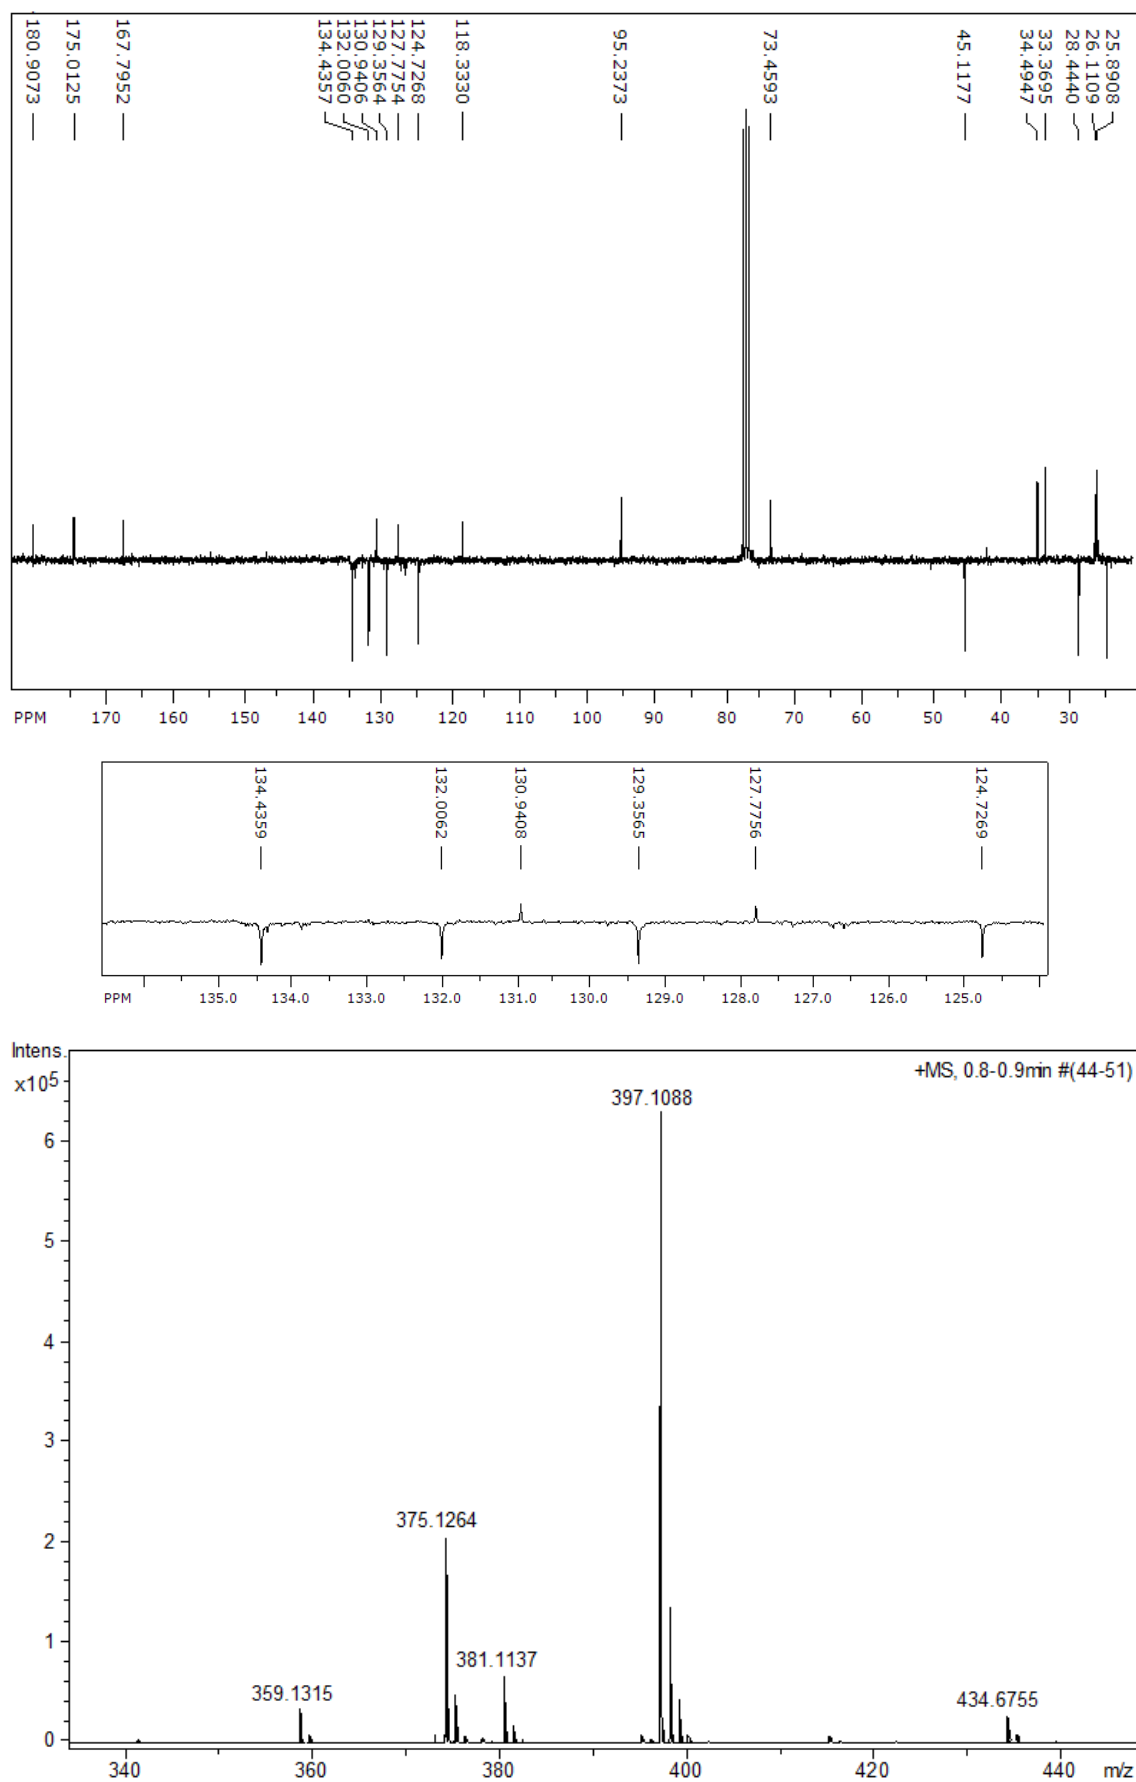

**Figure 07:** NMR and mass spectral data of the compound **7g**

*3-(Cyclohexylthio)-2,2-dimethyl-2,3-dihydronaphtho[1,2-b]furan-4,5-dione (4g)*

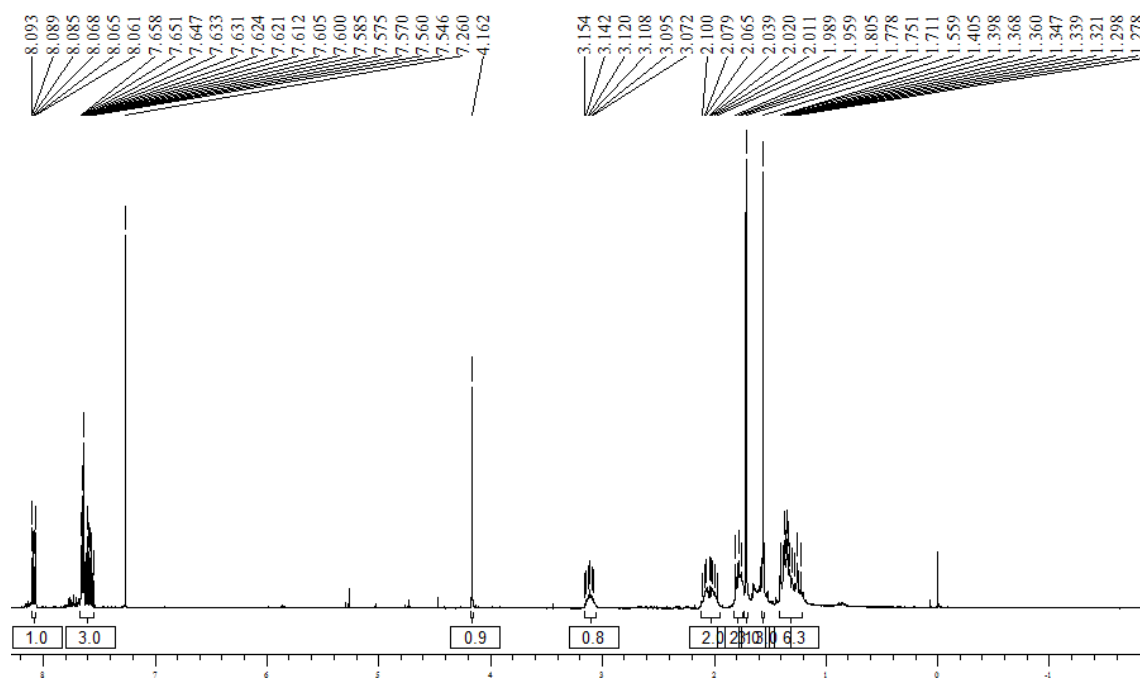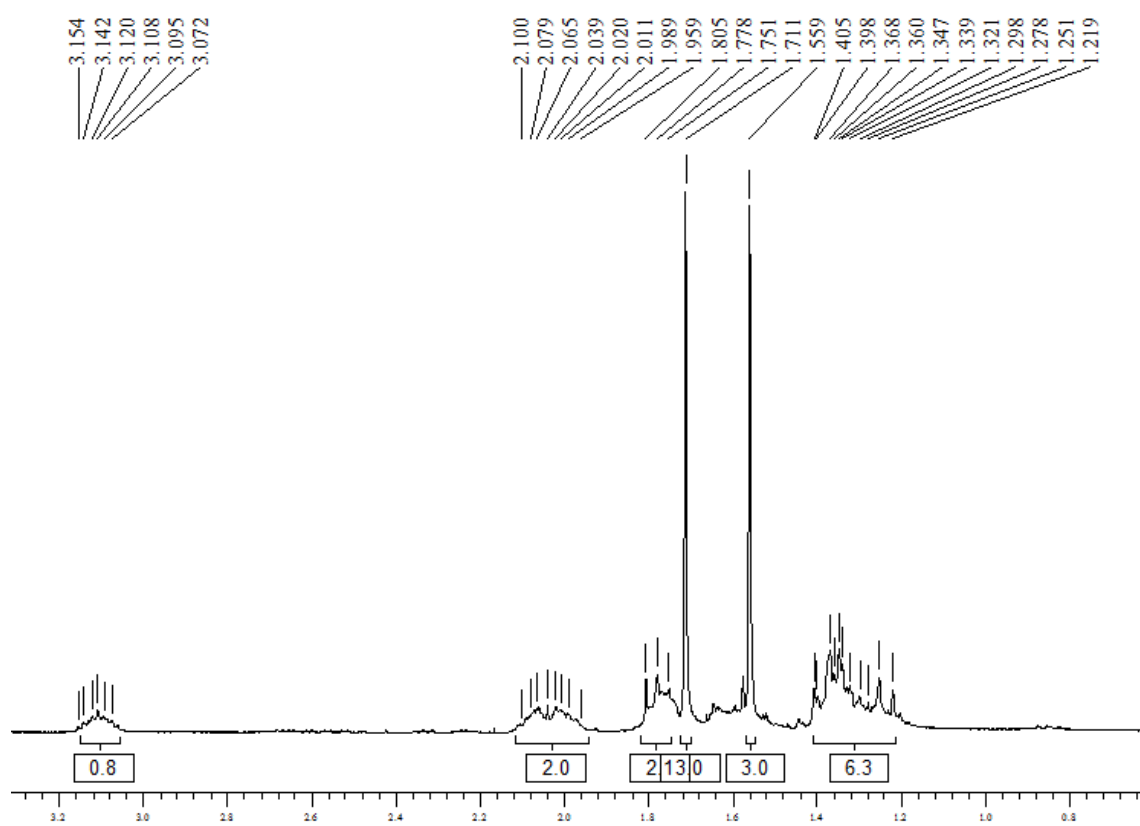

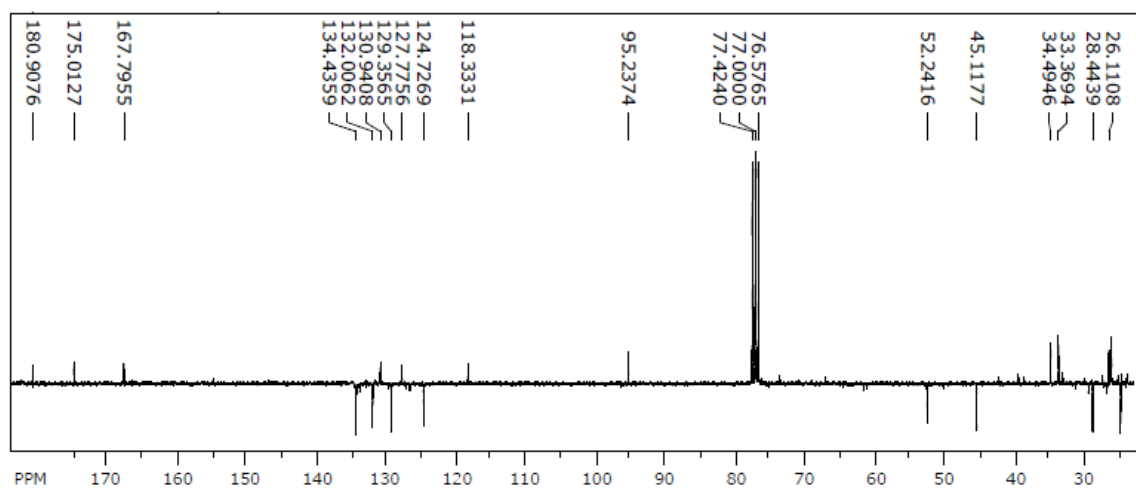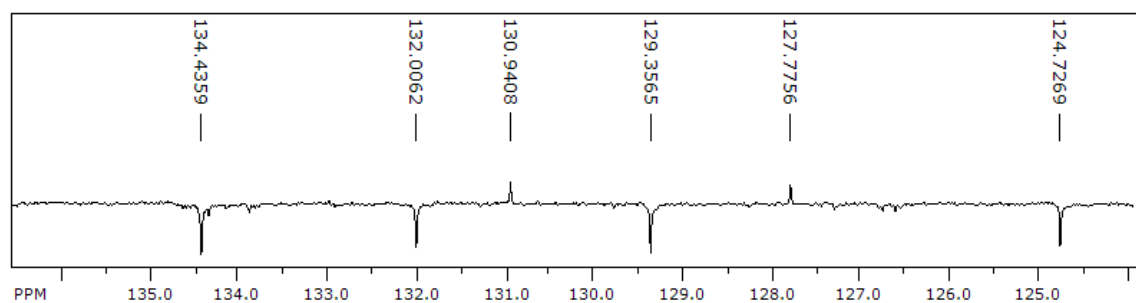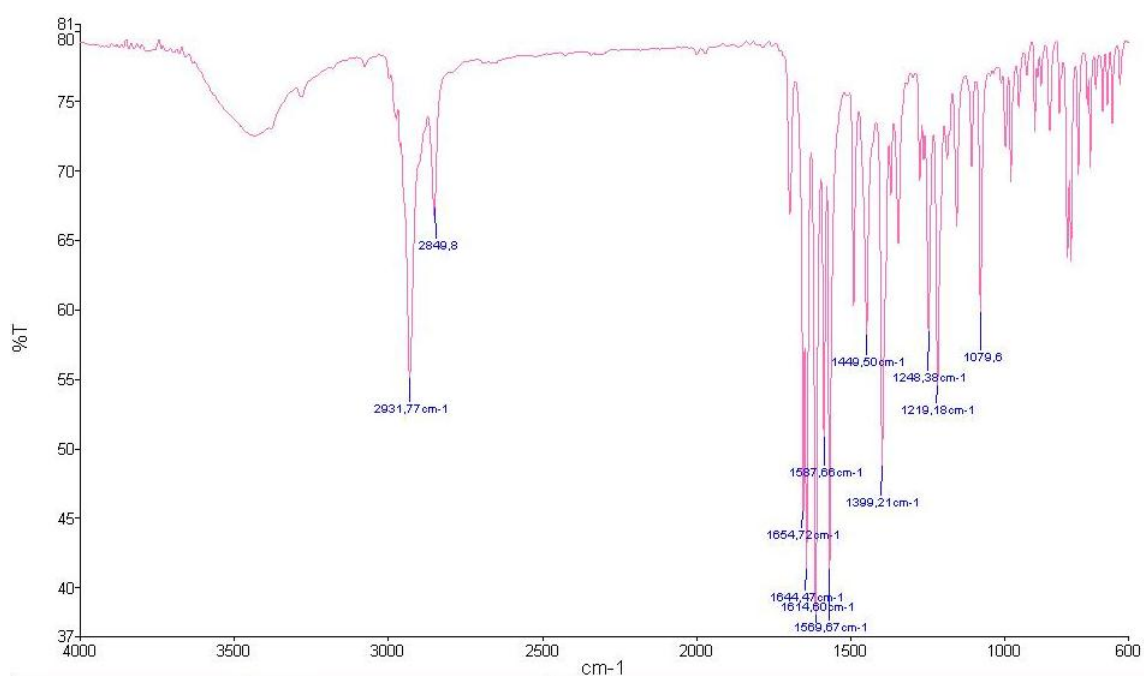

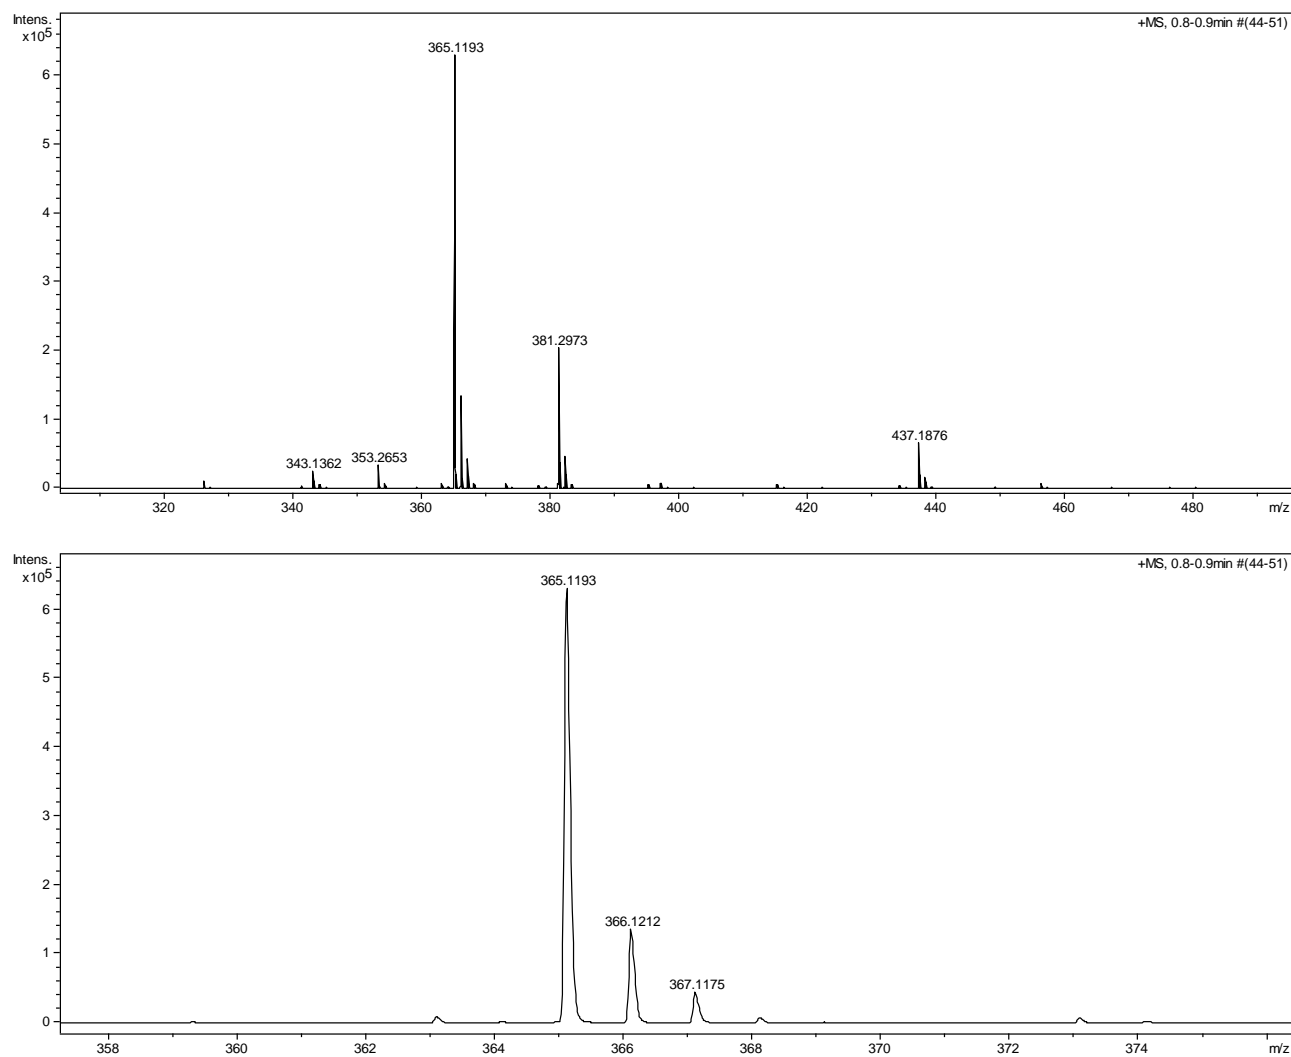

**Figure 08:** NMR and mass spectral data of the compound **4g**
